# Supplementary material
Source: PubMed Central journal article supplement (PMC3600484)
Supplement: 1212277109_pnas.201212277SI.pdf [file 1212277109_pnas.201212277SI.pdf]

# Supporting Information

Apte and Marshall 10.1073/pnas.1212277109

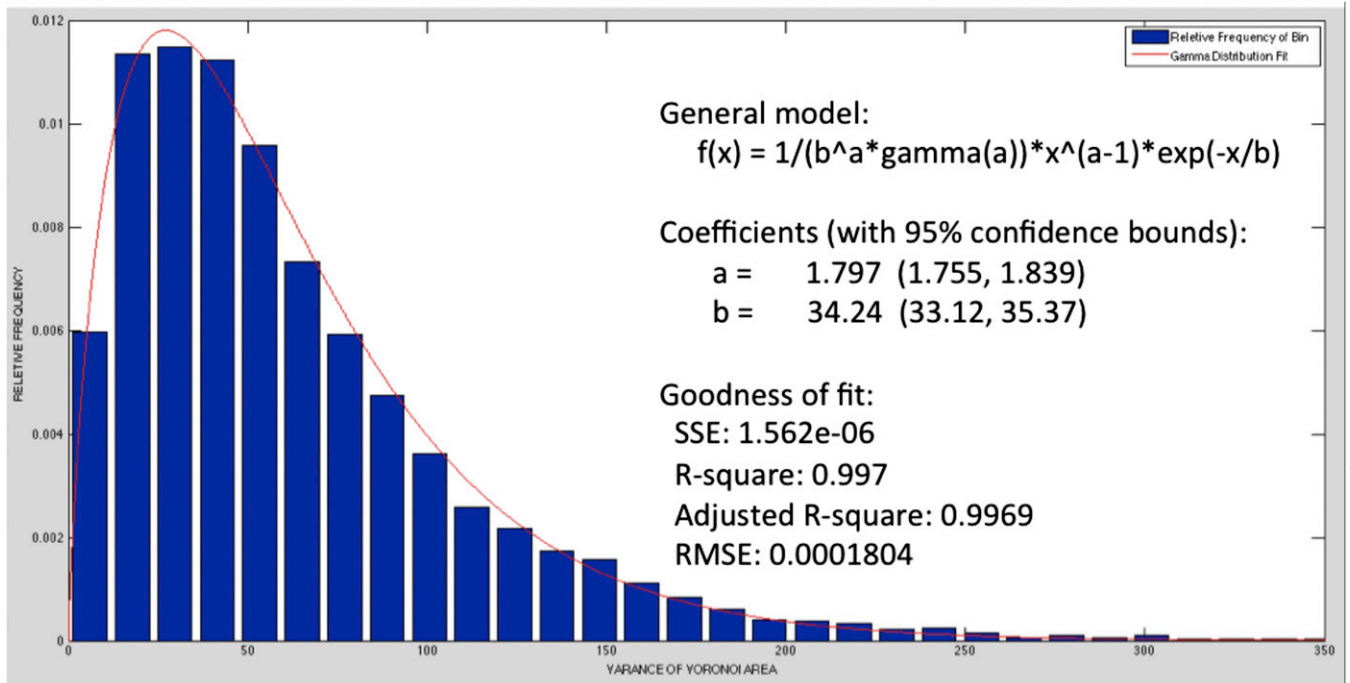

Fig. S1. Gamma distribution fit of the results of a simulation of a random cell with five organelles. This gamma distribution fits the simulation with an  $R^2$  value of 0.997. RMSE, root mean square error; SSE sum of squared errors.
